# Supplementary material for: Subcutaneous Vedolizumab Treatment in a Real-World Inflammatory Bowel Disease Cohort Switched From Intravenous Vedolizumab: Eighteen-Month Prospective Follow-up Study
Source: PubMed Central journal article supplement — Crohns Colitis 360. 2024 Feb 26;6(1):otae013. doi: 10.1093/crocol/otae013 (PMC10972549; doi:10.1093/crocol/otae013), 2024-02-26

## SUPPLEMENTARY TABLES AND FIGURES

### Supplementary Table 1

Clinical and biochemical disease activity and remission rates in patients with intravenous preference and subcutaneous or no preference at switch. P-values not displayed, as there were no significant differences in any of the variables.

|                                                              | <b>Intravenous preference</b> | <b>Subcutaneous preference/<br/>No preference</b> |
|--------------------------------------------------------------|-------------------------------|---------------------------------------------------|
| <b>CRP (mg/L), mean (95% CI),<br/>number of patients (n)</b> | 2.2 [1.2-3.1], n=27           | 3.0 [2.2-3.9], n=80                               |
| <b>FC (mg/kg), mean (95% CI),<br/>number of patients (n)</b> | 188 [57-320], n=15            | 127 [79-176], n=62                                |
| <b>HBI (median, range),<br/>number of patients (n)</b>       | 3 (0-7), n=13                 | 2 (0-16), n=43                                    |
| <b>PMS (median, range),<br/>number of patients (n)</b>       | 0 (0-2), n=14                 | 0 (0-3), n=37                                     |
| <b>Clinical remission, n (%)</b>                             | 22 (81)                       | 65 (81)                                           |
| <b>Biochemical remission, n (%)</b>                          | 10 (67)                       | 41 (66)                                           |
| <b>Combined remission, n (%)</b>                             | 8 (53)                        | 33 (53)                                           |

CRP C-reactive protein; FC faecal calprotectin; HBI Harvey Bradshaw Index; PMS partial Mayo score; Clinical remission defined as Partial Mayo Score  $\leq 1$  for Ulcerative colitis and Harvey Bradshaw Index  $\leq 4$  for Crohn's disease; Biochemical remission defined as C-reactive protein  $< 5$  mg/L and Fecal Calprotectin  $< 250$  mg/kg; Combined remission defined as clinical and biochemical remission.

## Supplementary Table 2

Details on patient changing biological treatment due to loss of response to subcutaneous vedolizumab.

|                                                          | <b>CD</b>               |                                  | <b>UC</b>               |                                  |
|----------------------------------------------------------|-------------------------|----------------------------------|-------------------------|----------------------------------|
| <b>Number</b>                                            | 7                       |                                  | 3                       |                                  |
| <b>Time to discontinuation in months, median (range)</b> | 6 (1-12)                |                                  | 11 (6-15)               |                                  |
|                                                          | <b>Status at switch</b> | <b>Status at discontinuation</b> | <b>Status at switch</b> | <b>Status at discontinuation</b> |
| <b>CRP (mg/L), median (IQR)</b>                          | 3.0 (0.9-9.4)           | 6.7 (2.3-19)                     | 1.7 (1.3-7.3)           | 2.6 (2.1-30.0)                   |
| <b>S-VDZ (mg/L), median (IQR)</b>                        | 22.1 (14.7-24.2)        | 41.0 (38.8-48.4)                 | 20.6 (16.2-27.7)        | 37.3 (27.2-55.6)                 |
| <b>HBI, median (range)</b>                               | 4 (0-11)                | 4 (0-8)                          |                         |                                  |
| <b>PMS, median (range)</b>                               |                         |                                  | 1 (0-3)                 | 0 (0-2)                          |

VDZ vedolizumab; CRP C-reactive protein; HBI Harvey Bradshaw Index; PMS partial Mayo score

### Supplementary Table 3

Marginal means with 95% confidence interval A) for 108 patients during 18-month follow-up estimated with linear mixed model for repeated measurements and B) for the 77 patients (76 patients, one missing laboratory data at 18-month follow-up) who continued subcutaneous vedolizumab throughout the entire follow-up period of 18 months estimated with linear mixed model for repeated measurements.

| <b>A</b>              | <b>Estimated means (95% CI)</b> |                  |                  |                  |                  |
|-----------------------|---------------------------------|------------------|------------------|------------------|------------------|
|                       | Before switch                   | Switch           | 6 months         | 12 months        | 18 months        |
| <b>CRP, mg/L</b>      | 3.4 [2.4-4.3]                   | 2.8 [1.9-3.7]    | 3.2 [2.3-4.2]    | 3.9 [2.9-5.0]    | 3.6 [2.5-4.7]    |
| <b>FC, mg/kg</b>      | 240 [171-306]                   | 144 [76-212]     | 187 [116-257]    | 183 [105-260]    | 150 [71-226]     |
| <b>Ferritin, µg/L</b> | 134 [103-166]                   | 167 [135-198]    | 174 [141-207]    | 156 [122-191]    | 153 [117-189]    |
| <b>S-VDZ, mg/L</b>    | 22.0 [20.3-23.6]                | 38.3 [36.6-40.0] | 48.0 [46.2-49.7] | 46.1 [44.2-47.9] | 39.2 [37.2-41.1] |

| <b>B</b>              | <b>Estimated means (95% CI)</b> |                  |                  |                  |                  |
|-----------------------|---------------------------------|------------------|------------------|------------------|------------------|
|                       | Before switch                   | Switch           | 6 months         | 12 months        | 18 months        |
| <b>CRP, mg/L</b>      | 3.5 [2.3-4.6]                   | 2.7 [1.6-3.8]    | 2.7 [1.6-3.8]    | 3.3 [2.2-4.4]    | 3.4 [2.3-4.5]    |
| <b>FC, mg/kg</b>      | 241 [160-322]                   | 109 [30-189]     | 147 [68-226]     | 157 [73-241]     | 132 [53-212]     |
| <b>Ferritin, µg/L</b> | 142 [102-181]                   | 162 [123-202]    | 185 [145-224]    | 165 [126-205]    | 157 [118-197]    |
| <b>S-VDZ, mg/L</b>    | 22.2 [20.3-24.0]                | 37.9 [36.1-39.8] | 48.2 [46.3-50.0] | 45.7 [43.4-47.6] | 39.1 [37.2-41.0] |

CI confidence interval; CRP C-reactive protein; FC faecal calprotectin; VDZ vedolizumab;

### Supplementary figure 1 Cumulative incidence

Cumulative incidence of discontinuing subcutaneous vedolizumab depicted using competing risk analysis with A) switching back to intravenous as main event and B) discontinuing vedolizumab due to loss of effect/surgery/remission/infection (e.g. all other causes for discontinuation) as competing event.

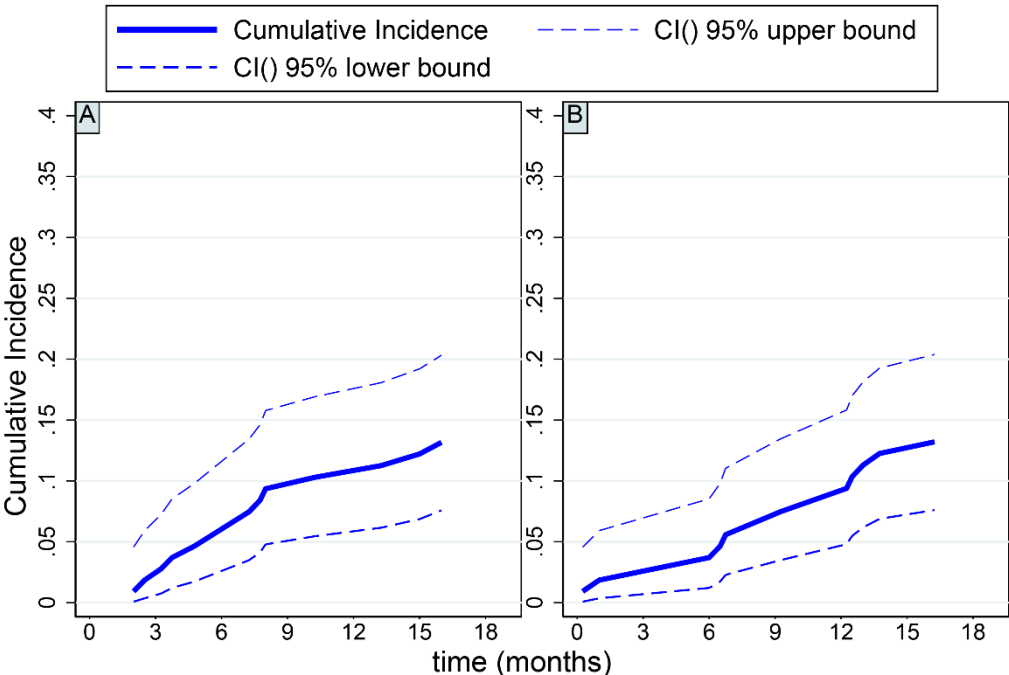

Supplement: otae013_suppl_supplementary_material.pdf [file otae013_suppl_supplementary_material.pdf]
